# Supplementary material for: Pro-survival factor EDEM3 confers therapy resistance in prostate cancer
Source: Research Square preprint supplement (doi:10.21203/rs.3.rs-1532644/v1), 2022-04-19
Supplement: Supplementary file 3 [file ad07c3b7c254e1ed4091ee90.xlsx]

## Sheet: Sheet1
GO biological process complete	Homo sapiens - REFLIST	FDR	20851)	upload_1	435)	upload_1	expected)	upload_1	over/under)	upload_1	fold Enrichment)	upload_1	raw P-value)	upload_1	FDR)
amide biosynthetic process	GO:0043604	3.65e-16	538	54	11.22	+	4.81	2.29e-20	3.65e-16
translation	GO:0006412	4.07e-16	389	46	8.12	+	5.67	5.11e-20	4.07e-16
peptide biosynthetic process	GO:0043043	5.13e-16	415	47	8.66	+	5.43	9.67e-20	5.13e-16
translational initiation	GO:0006413	7.51e-16	143	30	2.98	+	10.06	1.89e-19	7.51e-16
SRP-dependent cotranslational protein targeting to membrane	GO:0006614	8.01e-15	96	25	2	+	12.48	2.52e-18	8.01e-15
cellular amide metabolic process	GO:0043603	1.03e-14	797	62	16.63	+	3.73	3.88e-18	1.03e-14
cotranslational protein targeting to membrane	GO:0006613	1.61e-14	101	25	2.11	+	11.86	7.07e-18	1.61e-14
viral gene expression	GO:0019080	4.37e-14	132	27	2.75	+	9.8	2.2e-17	4.37e-14
nuclear-transcribed mRNA catabolic process, nonsense-mediated decay	GO:0000184	4.54e-14	120	26	2.5	+	10.39	2.57e-17	4.54e-14
protein targeting to ER	GO:0045047	6.4e-14	110	25	2.29	+	10.89	4.02e-17	6.4e-14
peptide metabolic process	GO:0006518	7.67e-14	537	49	11.2	+	4.37	5.3e-17	7.67e-14
establishment of protein localization to endoplasmic reticulum	GO:0072599	1.1e-13	114	25	2.38	+	10.51	8.32e-17	1.1e-13
viral transcription	GO:0019083	1.22e-13	115	25	2.4	+	10.42	9.94e-17	1.22e-13
protein localization to endoplasmic reticulum	GO:0070972	5.63e-13	138	26	2.88	+	9.03	4.96e-16	5.63e-13
protein targeting to membrane	GO:0006612	1.44e-11	177	27	3.69	+	7.31	1.36e-14	1.44e-11
establishment of protein localization to membrane	GO:0090150	1.54e-10	289	32	6.03	+	5.31	1.55e-13	1.54e-10
organonitrogen compound biosynthetic process	GO:1901566	6.46e-10	1410	74	29.42	+	2.52	6.9e-13	6.46e-10
nuclear-transcribed mRNA catabolic process	GO:0000956	7.62e-10	197	26	4.11	+	6.33	8.61e-13	7.62e-10
negative regulation of biological process	GO:0048519	7.97e-10	5388	182	112.41	+	1.62	9.52e-13	7.97e-10
mRNA catabolic process	GO:0006402	4.55e-09	216	26	4.51	+	5.77	5.72e-12	4.55e-09
positive regulation of biological process	GO:0048518	1.11e-08	6249	198	130.37	+	1.52	1.47e-11	1.11e-08
RNA catabolic process	GO:0006401	1.71e-08	251	27	5.24	+	5.16	2.37e-11	1.71e-08
response to oxygen-containing compound	GO:1901700	7.52e-08	1603	75	33.44	+	2.24	1.09e-10	7.52e-08
regulation of metabolic process	GO:0019222	1.04e-07	6755	206	140.92	+	1.46	1.56e-10	1.04e-07
positive regulation of cellular process	GO:0048522	1.39e-07	5520	177	115.16	+	1.54	2.19e-10	1.39e-07
organic substance biosynthetic process	GO:1901576	2.18e-07	2886	110	60.21	+	1.83	3.56e-10	2.18e-07
negative regulation of macromolecule metabolic process	GO:0010605	2.42e-07	2700	105	56.33	+	1.86	4.11e-10	2.42e-07
cellular response to chemical stimulus	GO:0070887	4.43e-07	2956	111	61.67	+	1.8	7.8e-10	4.43e-07
protein localization to membrane	GO:0072657	5.09e-07	514	36	10.72	+	3.36	9.27e-10	5.09e-07
protein targeting	GO:0006605	5.61e-07	371	30	7.74	+	3.88	1.13e-09	5.61e-07
response to chemical	GO:0042221	5.64e-07	4501	150	93.9	+	1.6	1.1e-09	5.64e-07
regulation of developmental process	GO:0050793	5.69e-07	2631	102	54.89	+	1.86	1.07e-09	5.69e-07
biological regulation	GO:0065007	5.89e-07	12491	322	260.59	+	1.24	1.22e-09	5.89e-07
regulation of macromolecule metabolic process	GO:0060255	6.12e-07	6204	190	129.43	+	1.47	1.31e-09	6.12e-07
cellular nitrogen compound biosynthetic process	GO:0044271	7.1e-07	1671	74	34.86	+	2.12	1.56e-09	7.1e-07
establishment of protein localization to organelle	GO:0072594	7.27e-07	450	33	9.39	+	3.52	1.64e-09	7.27e-07
response to organic substance	GO:0010033	7.49e-07	3025	112	63.11	+	1.77	1.74e-09	7.49e-07
biosynthetic process	GO:0009058	7.99e-07	2964	110	61.84	+	1.78	1.96e-09	7.99e-07
response to starvation	GO:0042594	8.18e-07	226	23	4.71	+	4.88	1.95e-09	8.18e-07
positive regulation of metabolic process	GO:0009893	8.44e-07	3702	129	77.23	+	1.67	2.12e-09	8.44e-07
regulation of lipid biosynthetic process	GO:0046890	1.1e-06	191	21	3.98	+	5.27	2.84e-09	1.1e-06
negative regulation of metabolic process	GO:0009892	1.2e-06	2960	109	61.75	+	1.77	3.16e-09	1.2e-06
regulation of biological process	GO:0050789	1.3e-06	11795	307	246.07	+	1.25	3.5e-09	1.3e-06
nucleobase-containing compound catabolic process	GO:0034655	2.22e-06	377	29	7.87	+	3.69	6.14e-09	2.22e-06
regulation of lipid metabolic process	GO:0019216	3.62e-06	411	30	8.57	+	3.5	1.02e-08	3.62e-06
cellular biosynthetic process	GO:0044249	5.55e-06	2782	102	58.04	+	1.76	1.6e-08	5.55e-06
cellular response to stress	GO:0033554	6.38e-06	1761	74	36.74	+	2.01	1.88e-08	6.38e-06
negative regulation of gene expression	GO:0010629	6.47e-06	1766	74	36.84	+	2.01	1.95e-08	6.47e-06
regulation of gene expression	GO:0010468	6.47e-06	4494	145	93.76	+	1.55	1.99e-08	6.47e-06
cellular process	GO:0009987	6.62e-06	14623	357	305.07	+	1.17	2.08e-08	6.62e-06
macromolecule biosynthetic process	GO:0009059	7.14e-06	1781	74	37.16	+	1.99	2.29e-08	7.14e-06
cellular response to starvation	GO:0009267	8.71e-06	180	19	3.76	+	5.06	2.95e-08	8.71e-06
regulation of multicellular organismal process	GO:0051239	8.82e-06	3187	112	66.49	+	1.68	2.94e-08	8.82e-06
viral process	GO:0016032	8.86e-06	792	43	16.52	+	2.6	2.9e-08	8.86e-06
response to hormone	GO:0009725	1.11e-05	920	47	19.19	+	2.45	3.82e-08	1.11e-05
response to drug	GO:0042493	1.35e-05	1019	50	21.26	+	2.35	4.75e-08	1.35e-05
valyl-tRNA aminoacylation	GO:0006438	1.64e-05	6	6	0.13	+	47.93	5.86e-08	1.64e-05
anatomical structure development	GO:0048856	1.64e-05	5451	166	113.72	+	1.46	5.99e-08	1.64e-05
cellular macromolecule biosynthetic process	GO:0034645	1.73e-05	1722	71	35.92	+	1.98	6.42e-08	1.73e-05
positive regulation of macromolecule metabolic process	GO:0010604	1.84e-05	3404	116	71.02	+	1.63	6.94e-08	1.84e-05
developmental process	GO:0032502	1.84e-05	5900	176	123.09	+	1.43	7.04e-08	1.84e-05
symbiotic process	GO:0044403	2.13e-05	884	45	18.44	+	2.44	8.42e-08	2.13e-05
response to nutrient levels	GO:0031667	2.14e-05	535	33	11.16	+	2.96	8.34e-08	2.14e-05
cellular response to nutrient levels	GO:0031669	2.18e-05	259	22	5.4	+	4.07	8.77e-08	2.18e-05
organic cyclic compound catabolic process	GO:1901361	2.33e-05	484	31	10.1	+	3.07	9.52e-08	2.33e-05
multicellular organism development	GO:0007275	2.43e-05	5065	156	105.67	+	1.48	1.01e-07	2.43e-05
response to extracellular stimulus	GO:0009991	2.46e-05	568	34	11.85	+	2.87	1.04e-07	2.46e-05
heterocycle catabolic process	GO:0046700	2.53e-05	434	29	9.05	+	3.2	1.08e-07	2.53e-05
cellular nitrogen compound catabolic process	GO:0044270	2.61e-05	435	29	9.08	+	3.2	1.13e-07	2.61e-05
response to endogenous stimulus	GO:0009719	2.84e-05	1506	64	31.42	+	2.04	1.25e-07	2.84e-05
response to lipid	GO:0033993	2.88e-05	867	44	18.09	+	2.43	1.28e-07	2.88e-05
cytoplasmic translation	GO:0002181	3.4e-05	73	12	1.52	+	7.88	1.56e-07	3.4e-05
regulation of protein metabolic process	GO:0051246	3.4e-05	2833	100	59.1	+	1.69	1.54e-07	3.4e-05
system development	GO:0048731	3.93e-05	4444	140	92.71	+	1.51	1.83e-07	3.93e-05
regulation of biological quality	GO:0065008	4.43e-05	4112	132	85.79	+	1.54	2.09e-07	4.43e-05
cellular response to stimulus	GO:0051716	4.56e-05	6783	194	141.51	+	1.37	2.18e-07	4.56e-05
aromatic compound catabolic process	GO:0019439	4.57e-05	450	29	9.39	+	3.09	2.21e-07	4.57e-05
regulation of cellular protein metabolic process	GO:0032268	4.63e-05	2660	95	55.49	+	1.71	2.27e-07	4.63e-05
cellular response to oxygen-containing compound	GO:1901701	6.86e-05	1077	50	22.47	+	2.23	3.41e-07	6.86e-05
tRNA aminoacylation for protein translation	GO:0006418	6.9e-05	50	10	1.04	+	9.59	3.47e-07	6.9e-05
positive regulation of developmental process	GO:0051094	7.05e-05	1388	59	28.96	+	2.04	3.63e-07	7.05e-05
cellular protein metabolic process	GO:0044267	7.1e-05	3700	121	77.19	+	1.57	3.61e-07	7.1e-05
ER-nucleus signaling pathway	GO:0006984	7.43e-05	38	9	0.79	+	11.35	3.92e-07	7.43e-05
positive regulation of multicellular organismal process	GO:0051240	7.46e-05	1768	70	36.88	+	1.9	3.89e-07	7.46e-05
regulation of translational fidelity	GO:0006450	7.75e-05	27	8	0.56	+	14.2	4.14e-07	7.75e-05
cellular response to organic substance	GO:0071310	8.86e-05	2396	87	49.99	+	1.74	4.79e-07	8.86e-05
aminoacyl-tRNA metabolism involved in translational fidelity	GO:0106074	8.97e-05	18	7	0.38	+	18.64	4.96e-07	8.97e-05
cellular response to external stimulus	GO:0071496	8.98e-05	363	25	7.57	+	3.3	4.91e-07	8.98e-05
cellular response to extracellular stimulus	GO:0031668	9.55e-05	290	22	6.05	+	3.64	5.34e-07	9.55e-05
tRNA aminoacylation	GO:0043039	9.84e-05	53	10	1.11	+	9.04	5.57e-07	9.84e-05
regulation of cell communication	GO:0010646	0.000107	3633	118	75.79	+	1.56	6.1e-07	0.000107
protein localization to organelle	GO:0033365	0.000111	765	39	15.96	+	2.44	6.49e-07	0.000111
amino acid activation	GO:0043038	0.000112	54	10	1.13	+	8.88	6.48e-07	0.000112
mRNA metabolic process	GO:0016071	0.000113	697	37	14.54	+	2.54	6.75e-07	0.000113
positive regulation of nitrogen compound metabolic process	GO:0051173	0.000113	3229	108	67.36	+	1.6	6.69e-07	0.000113
organonitrogen compound metabolic process	GO:1901564	0.000114	5299	158	110.55	+	1.43	6.9e-07	0.000114
positive regulation of cellular metabolic process	GO:0031325	0.000131	3394	112	70.81	+	1.58	7.97e-07	0.000131
regulation of multicellular organismal development	GO:2000026	0.000166	2066	77	43.1	+	1.79	1.02e-06	0.000166
response to organic cyclic compound	GO:0014070	0.000168	929	44	19.38	+	2.27	1.04e-06	0.000168
regulation of signal transduction	GO:0009966	0.000171	3151	105	65.74	+	1.6	1.07e-06	0.000171
positive regulation of locomotion	GO:0040017	0.000177	575	32	12	+	2.67	1.12e-06	0.000177
negative regulation of cellular process	GO:0048523	0.000195	4799	145	100.12	+	1.45	1.28e-06	0.000195
response to toxic substance	GO:0009636	0.000196	521	30	10.87	+	2.76	1.27e-06	0.000196
regulation of signaling	GO:0023051	0.000197	3673	118	76.63	+	1.54	1.26e-06	0.000197
regulation of fat cell differentiation	GO:0045598	0.000221	129	14	2.69	+	5.2	1.46e-06	0.000221
regulation of locomotion	GO:0040012	0.000239	1010	46	21.07	+	2.18	1.62e-06	0.000239
response to organonitrogen compound	GO:0010243	0.000241	1010	46	21.07	+	2.18	1.62e-06	0.000241
cellular response to chemical stress	GO:0062197	0.000242	287	21	5.99	+	3.51	1.66e-06	0.000242
regulation of cell differentiation	GO:0045595	0.000243	1844	70	38.47	+	1.82	1.62e-06	0.000243
positive regulation of cellular component movement	GO:0051272	0.000266	560	31	11.68	+	2.65	1.84e-06	0.000266
protein metabolic process	GO:0019538	0.000294	4282	132	89.33	+	1.48	2.05e-06	0.000294
negative regulation of intracellular signal transduction	GO:1902532	0.00032	508	29	10.6	+	2.74	2.25e-06	0.00032
regulation of growth	GO:0040008	0.000326	682	35	14.23	+	2.46	2.32e-06	0.000326
positive regulation of cell differentiation	GO:0045597	0.000329	992	45	20.7	+	2.17	2.35e-06	0.000329
regulation of protein modification process	GO:0031399	0.000395	1871	70	39.03	+	1.79	2.86e-06	0.000395
positive regulation of cell motility	GO:2000147	0.000399	544	30	11.35	+	2.64	2.91e-06	0.000399
cellular catabolic process	GO:0044248	0.000414	1805	68	37.66	+	1.81	3.05e-06	0.000414
positive regulation of gene expression	GO:0010628	0.000427	2032	74	42.39	+	1.75	3.17e-06	0.000427
regulation of phosphorylation	GO:0042325	0.000488	1627	63	33.94	+	1.86	3.65e-06	0.000488
response to acid chemical	GO:0001101	0.000491	355	23	7.41	+	3.11	3.7e-06	0.000491
regulation of protein phosphorylation	GO:0001932	0.000591	1458	58	30.42	+	1.91	4.49e-06	0.000591
tube development	GO:0035295	0.000619	857	40	17.88	+	2.24	4.74e-06	0.000619
cellular developmental process	GO:0048869	0.000624	3825	119	79.8	+	1.49	4.82e-06	0.000624
positive regulation of biosynthetic process	GO:0009891	0.000651	2055	74	42.87	+	1.73	5.07e-06	0.000651
response to stress	GO:0006950	0.000679	3620	114	75.52	+	1.51	5.38e-06	0.000679
negative regulation of protein metabolic process	GO:0051248	0.000682	1121	48	23.39	+	2.05	5.35e-06	0.000682
cellular metabolic process	GO:0044237	0.000728	7664	207	159.89	+	1.29	5.81e-06	0.000728
regulation of cellular component movement	GO:0051270	0.000734	1023	45	21.34	+	2.11	5.9e-06	0.000734
positive regulation of cellular biosynthetic process	GO:0031328	0.000773	2023	73	42.2	+	1.73	6.27e-06	0.000773
response to peptide	GO:1901652	0.000798	480	27	10.01	+	2.7	6.52e-06	0.000798
primary metabolic process	GO:0044238	0.000809	7463	202	155.7	+	1.3	6.66e-06	0.000809
cell differentiation	GO:0030154	0.00086	3732	116	77.86	+	1.49	7.13e-06	0.00086
regulation of cell motility	GO:2000145	0.000866	939	42	19.59	+	2.14	7.23e-06	0.000866
response to inorganic substance	GO:0010035	0.000877	542	29	11.31	+	2.56	7.39e-06	0.000877
response to peptide hormone	GO:0043434	0.000883	399	24	8.32	+	2.88	7.49e-06	0.000883
negative regulation of multicellular organismal process	GO:0051241	0.000915	1215	50	25.35	+	1.97	7.82e-06	0.000915
regulation of localization	GO:0032879	0.000921	2816	93	58.75	+	1.58	7.93e-06	0.000921
interspecies interaction between organisms	GO:0044419	0.000941	1997	72	41.66	+	1.73	8.16e-06	0.000941
regulation of sterol biosynthetic process	GO:0106118	0.000956	43	8	0.9	+	8.92	8.41e-06	0.000956
cellular response to endogenous stimulus	GO:0071495	0.000961	1221	50	25.47	+	1.96	8.51e-06	0.000961
metabolic process	GO:0008152	0.000961	8414	222	175.54	+	1.26	8.57e-06	0.000961
regulation of cholesterol biosynthetic process	GO:0045540	0.000963	43	8	0.9	+	8.92	8.41e-06	0.000963
response to stimulus	GO:0050896	0.000974	8544	225	178.25	+	1.26	8.82e-06	0.000974
positive regulation of transcription by RNA polymerase II	GO:0045944	0.000976	1223	50	25.51	+	1.96	8.77e-06	0.000976
macromolecule catabolic process	GO:0009057	0.000984	1054	45	21.99	+	2.05	8.96e-06	0.000984
animal organ development	GO:0048513	0.001	3215	103	67.07	+	1.54	9.19e-06	0.001
negative regulation of nitrogen compound metabolic process	GO:0051172	0.00114	2404	82	50.15	+	1.63	1.06e-05	0.00114
negative regulation of response to stimulus	GO:0048585	0.00116	1656	62	34.55	+	1.79	1.08e-05	0.00116
response to nitrogen compound	GO:1901698	0.00125	1093	46	22.8	+	2.02	1.18e-05	0.00125
regulation of primary metabolic process	GO:0080090	0.00125	6064	170	126.51	+	1.34	1.17e-05	0.00125
regulation of cellular response to stress	GO:0080135	0.00129	739	35	15.42	+	2.27	1.23e-05	0.00129
small molecule biosynthetic process	GO:0044283	0.00138	583	30	12.16	+	2.47	1.32e-05	0.00138
negative regulation of signal transduction	GO:0009968	0.00141	1278	51	26.66	+	1.91	1.35e-05	0.00141
positive regulation of macromolecule biosynthetic process	GO:0010557	0.00143	1931	69	40.29	+	1.71	1.38e-05	0.00143
regulation of cell death	GO:0010941	0.00146	1707	63	35.61	+	1.77	1.42e-05	0.00146
negative regulation of cell communication	GO:0010648	0.00151	1423	55	29.69	+	1.85	1.48e-05	0.00151
negative regulation of signaling	GO:0023057	0.00158	1427	55	29.77	+	1.85	1.56e-05	0.00158
cellular macromolecule catabolic process	GO:0044265	0.0017	912	40	19.03	+	2.1	1.72e-05	0.0017
regulation of phosphate metabolic process	GO:0019220	0.0017	1822	66	38.01	+	1.74	1.68e-05	0.0017
regulation of phosphorus metabolic process	GO:0051174	0.0017	1823	66	38.03	+	1.74	1.7e-05	0.0017
catabolic process	GO:0009056	0.00171	2078	73	43.35	+	1.68	1.72e-05	0.00171
PERK-mediated unfolded protein response	GO:0036499	0.00173	12	5	0.25	+	19.97	1.76e-05	0.00173
intracellular transport	GO:0046907	0.00181	1536	58	32.04	+	1.81	1.85e-05	0.00181
response to external stimulus	GO:0009605	0.00181	2472	83	51.57	+	1.61	1.86e-05	0.00181
regulation of cell migration	GO:0030334	0.00187	876	39	18.28	+	2.13	1.94e-05	0.00187
carboxylic acid metabolic process	GO:0019752	0.00192	879	39	18.34	+	2.13	2e-05	0.00192
regulation of intracellular signal transduction	GO:1902531	0.00206	1794	65	37.43	+	1.74	2.16e-05	0.00206
negative regulation of cellular protein metabolic process	GO:0032269	0.00211	1051	44	21.93	+	2.01	2.23e-05	0.00211
regulation of programmed cell death	GO:0043067	0.00222	1580	59	32.96	+	1.79	2.35e-05	0.00222
glucose homeostasis	GO:0042593	0.00247	193	15	4.03	+	3.73	2.64e-05	0.00247
positive regulation of RNA metabolic process	GO:0051254	0.00249	1746	63	36.43	+	1.73	2.67e-05	0.00249
carbohydrate homeostasis	GO:0033500	0.00259	194	15	4.05	+	3.71	2.8e-05	0.00259
RNA metabolic process	GO:0016070	0.00275	1701	62	35.49	+	1.75	2.99e-05	0.00275
cellular response to toxic substance	GO:0097237	0.0028	220	16	4.59	+	3.49	3.06e-05	0.0028
positive regulation of transcription, DNA-templated	GO:0045893	0.00284	1558	58	32.5	+	1.78	3.15e-05	0.00284
regulation of apoptotic process	GO:0042981	0.00286	1558	58	32.5	+	1.78	3.15e-05	0.00286
regulation of steroid biosynthetic process	GO:0050810	0.00291	88	10	1.84	+	5.45	3.23e-05	0.00291
cellular response to drug	GO:0035690	0.00304	411	23	8.57	+	2.68	3.4e-05	0.00304
positive regulation of cell migration	GO:0030335	0.00314	519	27	10.83	+	2.49	3.54e-05	0.00314
negative regulation of growth	GO:0045926	0.00327	249	17	5.19	+	3.27	3.69e-05	0.00327
regulation of response to stimulus	GO:0048583	0.00329	4329	127	90.31	+	1.41	3.75e-05	0.00329
positive regulation of nucleic acid-templated transcription	GO:1903508	0.0033	1656	60	34.55	+	1.74	3.78e-05	0.0033
positive regulation of RNA biosynthetic process	GO:1902680	0.00332	1657	60	34.57	+	1.74	3.82e-05	0.00332
intracellular protein transport	GO:0006886	0.00346	1002	42	20.9	+	2.01	4e-05	0.00346
multicellular organismal process	GO:0032501	0.00348	7015	188	146.35	+	1.28	4.04e-05	0.00348
organic substance metabolic process	GO:0071704	0.00348	7841	206	163.58	+	1.26	4.06e-05	0.00348
cellular response to lipid	GO:0071396	0.0036	529	27	11.04	+	2.45	4.23e-05	0.0036
negative regulation of cell death	GO:0060548	0.0037	1013	42	21.13	+	1.99	4.38e-05	0.0037
biological_process	GO:0008150	0.00381	17794	400	371.22	+	1.08	4.55e-05	0.00381
Unclassified	UNCLASSIFIED	0.00383	3057	35	63.78	-	0.55	4.55e-05	0.00383
regulation of cholesterol metabolic process	GO:0090181	0.00386	56	8	1.17	+	6.85	4.64e-05	0.00386
cellular macromolecule metabolic process	GO:0044260	0.00389	5073	144	105.83	+	1.36	4.72e-05	0.00389
activation of immune response	GO:0002253	0.00391	519	0	10.83	-	< 0.01	4.71e-05	0.00391
regulation of cell growth	GO:0001558	0.0041	422	23	8.8	+	2.61	4.99e-05	0.0041
neurogenesis	GO:0022008	0.00441	1664	60	34.71	+	1.73	5.44e-05	0.00441
regulation of alcohol biosynthetic process	GO:1902930	0.00444	75	9	1.56	+	5.75	5.44e-05	0.00444
regulation of anatomical structure morphogenesis	GO:0022603	0.00451	1099	44	22.93	+	1.92	5.61e-05	0.00451
response to endoplasmic reticulum stress	GO:0034976	0.00452	258	17	5.38	+	3.16	5.6e-05	0.00452
response to insulin	GO:0032868	0.00513	235	16	4.9	+	3.26	6.42e-05	0.00513
regulation of intrinsic apoptotic signaling pathway	GO:2001242	0.00562	163	13	3.4	+	3.82	7.07e-05	0.00562
positive regulation of protein metabolic process	GO:0051247	0.00583	1727	61	36.03	+	1.69	7.4e-05	0.00583
negative regulation of cellular metabolic process	GO:0031324	0.00584	2603	84	54.3	+	1.55	7.38e-05	0.00584
nervous system development	GO:0007399	0.00587	2383	78	49.71	+	1.57	7.49e-05	0.00587
positive regulation of nucleobase-containing compound metabolic process	GO:0045935	0.00595	1911	66	39.87	+	1.66	7.63e-05	0.00595
positive regulation of neurogenesis	GO:0050769	0.00638	487	25	10.16	+	2.46	8.22e-05	0.00638
cellular response to hormone stimulus	GO:0032870	0.00651	613	29	12.79	+	2.27	8.43e-05	0.00651
cellular response to oxidative stress	GO:0034599	0.00652	241	16	5.03	+	3.18	8.48e-05	0.00652
positive regulation of cellular protein metabolic process	GO:0032270	0.00714	1618	58	33.76	+	1.72	9.42e-05	0.00714
tissue development	GO:0009888	0.00717	1781	62	37.16	+	1.67	9.41e-05	0.00717
positive regulation of neuron differentiation	GO:0045666	0.00719	382	21	7.97	+	2.64	9.4e-05	0.00719
cell development	GO:0048468	0.00737	1626	58	33.92	+	1.71	9.77e-05	0.00737
response to hexose	GO:0009746	0.00768	146	12	3.05	+	3.94	0.000102	0.00768
detection of chemical stimulus involved in sensory perception	GO:0050907	0.00787	483	0	10.08	-	< 0.01	0.000105	0.00787
regulation of cell population proliferation	GO:0042127	0.00806	1642	58	34.26	+	1.69	0.000109	0.00806
ribosome assembly	GO:0042255	0.00809	64	8	1.34	+	5.99	0.000109	0.00809
macromolecule localization	GO:0033036	0.00872	2538	81	52.95	+	1.53	0.000118	0.00872
regulation of biosynthetic process	GO:0009889	0.00919	4301	124	89.73	+	1.38	0.000125	0.00919
connective tissue development	GO:0061448	0.00936	224	15	4.67	+	3.21	0.000128	0.00936
regulation of nitrogen compound metabolic process	GO:0051171	0.00946	5881	160	122.69	+	1.3	0.000131	0.00946
negative regulation of developmental process	GO:0051093	0.0095	965	39	20.13	+	1.94	0.000131	0.0095
response to monosaccharide	GO:0034284	0.0099	151	12	3.15	+	3.81	0.000137	0.0099
oxoacid metabolic process	GO:0043436	0.0101	971	39	20.26	+	1.93	0.000141	0.0101
immune response-activating signal transduction	GO:0002757	0.0101	448	0	9.35	-	< 0.01	0.000142	0.0101
immune response-activating cell surface receptor signaling pathway	GO:0002429	0.0102	448	0	9.35	-	< 0.01	0.000142	0.0102
intrinsic apoptotic signaling pathway in response to endoplasmic reticulum stress	GO:0070059	0.0106	34	6	0.71	+	8.46	0.00015	0.0106
fat cell differentiation	GO:0045444	0.011	108	10	2.25	+	4.44	0.000157	0.011
regulation of response to endoplasmic reticulum stress	GO:1905897	0.0117	88	9	1.84	+	4.9	0.000167	0.0117
gene expression	GO:0010467	0.0119	2038	68	42.52	+	1.6	0.00017	0.0119
regulation of cellular metabolic process	GO:0031323	0.0122	6272	168	130.85	+	1.28	0.000175	0.0122
nitrogen compound metabolic process	GO:0006807	0.0123	7000	184	146.04	+	1.26	0.000179	0.0123
response to carbohydrate	GO:0009743	0.0124	180	13	3.76	+	3.46	0.000179	0.0124
cellular amino acid metabolic process	GO:0006520	0.0135	288	17	6.01	+	2.83	0.000196	0.0135
response to retinoic acid	GO:0032526	0.014	112	10	2.34	+	4.28	0.000206	0.014
cellular nitrogen compound metabolic process	GO:0034641	0.014	3465	103	72.29	+	1.42	0.000205	0.014
regulation of apoptotic signaling pathway	GO:2001233	0.0141	406	21	8.47	+	2.48	0.000209	0.0141
regulation of smooth muscle cell proliferation	GO:0048660	0.0143	135	11	2.82	+	3.91	0.000212	0.0143
cellular protein localization	GO:0034613	0.0143	1636	57	34.13	+	1.67	0.000213	0.0143
blood vessel development	GO:0001568	0.0146	497	24	10.37	+	2.31	0.00022	0.0146
generation of neurons	GO:0048699	0.0146	1561	55	32.57	+	1.69	0.000222	0.0146
regulation of cellular process	GO:0050794	0.0146	11077	270	231.09	+	1.17	0.000218	0.0146
detection of chemical stimulus involved in sensory perception of smell	GO:0050911	0.0146	439	0	9.16	-	< 0.01	0.000219	0.0146
cellular macromolecule localization	GO:0070727	0.0147	1644	57	34.3	+	1.66	0.000222	0.0147
positive regulation of protein modification process	GO:0031401	0.0148	1243	46	25.93	+	1.77	0.000226	0.0148
behavior	GO:0007610	0.0162	596	27	12.43	+	2.17	0.000251	0.0162
organic acid metabolic process	GO:0006082	0.0162	992	39	20.7	+	1.88	0.00025	0.0162
organic substance catabolic process	GO:1901575	0.0162	1763	60	36.78	+	1.63	0.000249	0.0162
heterocycle metabolic process	GO:0046483	0.0162	2998	91	62.55	+	1.45	0.000253	0.0162
organic cyclic compound metabolic process	GO:1901360	0.0162	3277	98	68.37	+	1.43	0.000249	0.0162
cellular response to glucose starvation	GO:0042149	0.0164	38	6	0.79	+	7.57	0.000257	0.0164
tube morphogenesis	GO:0035239	0.0169	657	29	13.71	+	2.12	0.000267	0.0169
response to corticosteroid	GO:0031960	0.017	163	12	3.4	+	3.53	0.000267	0.017
positive regulation of cell development	GO:0010720	0.0174	563	26	11.75	+	2.21	0.000276	0.0174
positive regulation of signal transduction	GO:0009967	0.0183	1706	58	35.59	+	1.63	0.000292	0.0183
positive regulation of response to endoplasmic reticulum stress	GO:1905898	0.0184	39	6	0.81	+	7.37	0.000292	0.0184
ribosomal large subunit biogenesis	GO:0042273	0.0184	75	8	1.56	+	5.11	0.000295	0.0184
response to glucose	GO:0009749	0.0187	141	11	2.94	+	3.74	0.0003	0.0187
detection of stimulus involved in sensory perception	GO:0050906	0.0187	545	1	11.37	-	0.09	0.000303	0.0187
regulation of steroid metabolic process	GO:0019218	0.0188	118	10	2.46	+	4.06	0.000304	0.0188
response to unfolded protein	GO:0006986	0.019	166	12	3.46	+	3.47	0.000312	0.019
regulation of small molecule metabolic process	GO:0062012	0.019	442	22	9.22	+	2.39	0.00031	0.019
anatomical structure formation involved in morphogenesis	GO:0048646	0.019	896	36	18.69	+	1.93	0.000309	0.019
regulation of neuron differentiation	GO:0045664	0.0197	670	29	13.98	+	2.07	0.000324	0.0197
positive regulation of signaling	GO:0023056	0.0205	1944	64	40.56	+	1.58	0.000339	0.0205
negative regulation of protein phosphorylation	GO:0001933	0.0215	409	21	8.53	+	2.46	0.000356	0.0215
regulation of cysteine-type endopeptidase activity involved in apoptotic process	GO:0043281	0.0218	221	14	4.61	+	3.04	0.000363	0.0218
negative regulation of phosphorylation	GO:0042326	0.0219	450	22	9.39	+	2.34	0.000366	0.0219
cholesterol biosynthetic process	GO:0006695	0.0222	41	6	0.86	+	7.01	0.000372	0.0222
response to antineoplastic agent	GO:0097327	0.0223	99	9	2.07	+	4.36	0.000376	0.0223
cholesterol metabolic process	GO:0008203	0.023	122	10	2.55	+	3.93	0.00039	0.023
response to glucocorticoid	GO:0051384	0.0234	146	11	3.05	+	3.61	0.000396	0.0234
lipid biosynthetic process	GO:0008610	0.0236	583	26	12.16	+	2.14	0.000401	0.0236
aging	GO:0007568	0.0237	279	16	5.82	+	2.75	0.000406	0.0237
negative regulation of programmed cell death	GO:0043069	0.0237	921	36	19.21	+	1.87	0.000407	0.0237
small molecule metabolic process	GO:0044281	0.024	1717	58	35.82	+	1.62	0.000413	0.024
lung development	GO:0030324	0.0242	172	12	3.59	+	3.34	0.000421	0.0242
regulation of epithelial cell proliferation	GO:0050678	0.0242	338	18	7.05	+	2.55	0.00042	0.0242
establishment of protein localization	GO:0045184	0.0242	1617	55	33.73	+	1.63	0.000419	0.0242
detection of chemical stimulus	GO:0009593	0.0244	519	1	10.83	-	0.09	0.000426	0.0244
gland development	GO:0048732	0.0245	421	21	8.78	+	2.39	0.00043	0.0245
memory	GO:0007613	0.025	124	10	2.59	+	3.87	0.000439	0.025
mRNA transcription	GO:0009299	0.0252	27	5	0.56	+	8.88	0.000445	0.0252
cellular response to corticosteroid stimulus	GO:0071384	0.0264	61	7	1.27	+	5.5	0.00047	0.0264
positive regulation of phosphorylation	GO:0042327	0.0265	1090	41	22.74	+	1.8	0.000469	0.0265
positive regulation of nervous system development	GO:0051962	0.0267	555	25	11.58	+	2.16	0.000477	0.0267
response to ketone	GO:1901654	0.0271	201	13	4.19	+	3.1	0.000486	0.0271
positive regulation of lipid metabolic process	GO:0045834	0.0273	150	11	3.13	+	3.52	0.000491	0.0273
positive regulation of lipid biosynthetic process	GO:0046889	0.0283	82	8	1.71	+	4.68	0.000512	0.0283
respiratory tube development	GO:0030323	0.0283	176	12	3.67	+	3.27	0.000511	0.0283
vasculature development	GO:0001944	0.0284	519	24	10.83	+	2.22	0.000516	0.0284
secondary alcohol biosynthetic process	GO:1902653	0.0287	44	6	0.92	+	6.54	0.000523	0.0287
localization	GO:0051179	0.0291	5778	154	120.54	+	1.28	0.000532	0.0291
response to antibiotic	GO:0046677	0.0295	316	17	6.59	+	2.58	0.00054	0.0295
detection of stimulus	GO:0051606	0.0312	702	3	14.65	-	0.2	0.000575	0.0312
ribosomal large subunit assembly	GO:0000027	0.0321	29	5	0.61	+	8.26	0.000594	0.0321
metanephros development	GO:0001656	0.0321	84	8	1.75	+	4.57	0.000594	0.0321
cardiovascular system development	GO:0072358	0.0322	529	24	11.04	+	2.17	0.000599	0.0322
positive regulation of cell communication	GO:0010647	0.0327	1936	63	40.39	+	1.56	0.00061	0.0327
peripheral nervous system axon regeneration	GO:0014012	0.0342	6	3	0.13	+	23.97	0.00065	0.0342
regulation of fatty acid biosynthetic process	GO:0042304	0.0342	46	6	0.96	+	6.25	0.000647	0.0342
negative regulation of protein kinase B signaling	GO:0051898	0.0343	46	6	0.96	+	6.25	0.000647	0.0343
ossification	GO:0001503	0.0343	263	15	5.49	+	2.73	0.000643	0.0343
anatomical structure morphogenesis	GO:0009653	0.0343	2174	69	45.35	+	1.52	0.000645	0.0343
nucleic acid metabolic process	GO:0090304	0.0348	2301	72	48	+	1.5	0.000662	0.0348
negative regulation of response to drug	GO:2001024	0.0357	30	5	0.63	+	7.99	0.000682	0.0357
negative regulation of cysteine-type endopeptidase activity involved in apoptotic process	GO:0043154	0.0358	86	8	1.79	+	4.46	0.000685	0.0358
developmental maturation	GO:0021700	0.0363	237	14	4.94	+	2.83	0.000699	0.0363
positive regulation of phosphate metabolic process	GO:0045937	0.0364	1160	42	24.2	+	1.74	0.000704	0.0364
positive regulation of phosphorus metabolic process	GO:0010562	0.0365	1160	42	24.2	+	1.74	0.000704	0.0365
neuron differentiation	GO:0030182	0.0366	1016	38	21.2	+	1.79	0.000714	0.0366
negative regulation of fat cell differentiation	GO:0045599	0.0367	47	6	0.98	+	6.12	0.000717	0.0367
protein localization	GO:0008104	0.0367	2201	69	45.92	+	1.5	0.000713	0.0367
regulation of cellular biosynthetic process	GO:0031326	0.0373	4222	118	88.08	+	1.34	0.000732	0.0373
secondary alcohol metabolic process	GO:1902652	0.0393	134	10	2.8	+	3.58	0.000772	0.0393
regulation of translation	GO:0006417	0.0399	374	19	7.8	+	2.44	0.000786	0.0399
ribonucleoprotein complex assembly	GO:0022618	0.0404	186	12	3.88	+	3.09	0.000808	0.0404
response to steroid hormone	GO:0048545	0.0405	328	17	6.84	+	2.48	0.000802	0.0405
regulation of neurogenesis	GO:0050767	0.0405	838	33	17.48	+	1.89	0.000805	0.0405
regulation of molecular function	GO:0065009	0.0405	3063	90	63.9	+	1.41	0.000806	0.0405
negative regulation of apoptotic process	GO:0043066	0.0406	904	35	18.86	+	1.86	0.000815	0.0406
lipid metabolic process	GO:0006629	0.0408	1195	43	24.93	+	1.72	0.00082	0.0408
apoptotic process	GO:0006915	0.0411	907	35	18.92	+	1.85	0.000828	0.0411
regulation of neuron apoptotic process	GO:0043523	0.0416	214	13	4.46	+	2.91	0.000842	0.0416
nucleobase-containing compound metabolic process	GO:0006139	0.0422	2813	84	58.69	+	1.43	0.000856	0.0422
cellular response to acid chemical	GO:0071229	0.0429	215	13	4.49	+	2.9	0.000877	0.0429
sterol biosynthetic process	GO:0016126	0.043	49	6	1.02	+	5.87	0.000875	0.043
response to topologically incorrect protein	GO:0035966	0.0431	188	12	3.92	+	3.06	0.000882	0.0431
immune response-regulating cell surface receptor signaling pathway	GO:0002768	0.0437	483	1	10.08	-	0.1	0.000902	0.0437
sterol metabolic process	GO:0016125	0.0438	137	10	2.86	+	3.5	0.000905	0.0438
cellular localization	GO:0051641	0.0438	2422	74	50.53	+	1.46	0.000901	0.0438
L-serine biosynthetic process	GO:0006564	0.0439	7	3	0.15	+	20.54	0.000914	0.0439
immune response-regulating signaling pathway	GO:0002764	0.0441	486	1	10.14	-	0.1	0.000914	0.0441
retina vasculature development in camera-type eye	GO:0061298	0.045	18	4	0.38	+	10.65	0.00094	0.045
regulation of cysteine-type endopeptidase activity	GO:2000116	0.0453	245	14	5.11	+	2.74	0.000947	0.0453
organic substance transport	GO:0071702	0.0463	2220	69	46.31	+	1.49	0.000971	0.0463
cell death	GO:0008219	0.0472	1073	39	22.39	+	1.74	0.000997	0.0472
cellular response to retinoic acid	GO:0071300	0.0473	70	7	1.46	+	4.79	0.000996	0.0473
cognition	GO:0050890	0.0473	305	16	6.36	+	2.51	0.001	0.0473
positive regulation of transcription from RNA polymerase II promoter in response to stress	GO:0036003	0.0474	33	5	0.69	+	7.26	0.001	0.0474
response to oxidative stress	GO:0006979	0.0479	390	19	8.14	+	2.34	0.00102	0.0479
cellular glucose homeostasis	GO:0001678	0.0481	92	8	1.92	+	4.17	0.00103	0.0481
negative regulation of biosynthetic process	GO:0009890	0.0482	1596	53	33.3	+	1.59	0.00103	0.0482
regulation of cellular amide metabolic process	GO:0034248	0.0486	427	20	8.91	+	2.25	0.00105	0.0486
cell communication	GO:0007154	0.0486	5595	148	116.72	+	1.27	0.00104	0.0486
regulation of catalytic activity	GO:0050790	0.0491	2385	73	49.76	+	1.47	0.00106	0.0491
cellular response to glucose stimulus	GO:0071333	0.0496	71	7	1.48	+	4.73	0.00108	0.0496
