# Supplementary material for: Pro-survival factor EDEM3 confers therapy resistance in prostate cancer
Source: Research Square preprint supplement (doi:10.21203/rs.3.rs-1532644/v1), 2022-04-19
Supplement: Supplementary file 4 [file b7d19734bce9b6384f4f67d0.xlsx]

## Sheet: Sheet1
Upregulated genes	Adjusted p value		Downregulated genes	Adjusted p value
SCD	7.90167e-33		ID2	1.06971e-30
OLMALINC	1.85623e-13		MT1G	1.88122e-11
FAM46C	2.29745e-12		DHRS2	1.88122e-11
NKX3-1	2.2994e-10		IARS2	5.78937e-11
INSIG1	6.72638e-10		BRINP1	6.02844e-11
ARHGAP20	1.48705e-09		IGFBP1	7.98496e-10
SREBF1	6.9061e-09		MT1X	7.98496e-10
LENG1	2.77065e-08		CUTC	7.39779e-09
SNAI2	5.41549e-08		ID1	8.41651e-09
SOX9	3.27911e-07		IGFBP3	9.37719e-09
CEBPG	7.77842e-07		COX18	1.49934e-07
C1orf21	7.97916e-07		LINC00511	7.46157e-07
SERPINB6	3.47829e-06		ID3	7.97916e-07
FDFT1	3.65819e-06		RN7SL2	2.15421e-06
RPL3P4	4.54152e-06		MT2A	2.15421e-06
STC1	5.2554e-06		PCCB	2.15421e-06
ACSS2	5.74741e-06		DUSP2	2.56166e-06
PHLDA1	6.08054e-06		ARL6IP1	2.56166e-06
RGS2	7.53627e-06		EXOSC2	3.8641e-06
SIAH2	1.85649e-05		TNFRSF21	4.15804e-06
TMPRSS2	2.13063e-05		HMGN5	5.69383e-06
MAF	3.19283e-05		CRIP1	5.80088e-06
CYP51A1	3.63047e-05		TDG	1.30319e-05
ADM2	4.21246e-05		SELENOW	1.55933e-05
PGPEP1	5.67094e-05		UQCRQ	1.85649e-05
VARS2	6.10179e-05		IMPA1	2.72602e-05
PPP1R1B	7.13627e-05		PBK	3.50324e-05
PRR16	7.16199e-05		BASP1	3.70104e-05
MGAT3	0.000120421		CLU	4.57169e-05
ERG28	0.000144425		DEFB132	5.84e-05
TSC22D3	0.000144425		CD9	7.09792e-05
IGFBP2	0.0001683		MTERF4	7.10385e-05
KLF13	0.000172309		GATA2	8.61734e-05
NPTX2	0.00022041		GPSM2	8.61734e-05
PLPP2	0.000226205		AMACR	0.000109038
EGR2	0.000226205		VTA1	0.000115962
FAM129A	0.000235804		RSRC1	0.00012331
SYT12	0.000235804		ATP1B1	0.000124928
FGD1	0.000263967		TRIM26	0.000139725
GDF7	0.000265306		AP000275.2	0.000143402
EIF3L	0.000270337		MORF4L1	0.000144425
SHMT2	0.000279256		MYL6	0.000181328
SREBF2	0.000305123		ABCE1	0.000193064
SV2A	0.000374584		NEK2	0.000193567
STK39	0.000389324		GPER1	0.000197075
CFAP69	0.000503567		SPTSSB	0.000212251
ATF4	0.000526081		CTSO	0.00022041
SHD	0.000532763		PRRG4	0.00022041
RPS9	0.000658151		EPHA5-AS1	0.000233173
HERPUD1	0.000658151		NDUFB6	0.000314591
NXPH4	0.000658151		VIL1	0.000369542
SRRM3	0.000774195		BIRC5	0.000374584
DDIT4	0.00077879		RAB11A	0.000374584
TOB2	0.000811839		OIP5	0.000499704
RPL35A	0.000925288		GPN3	0.000532763
ITGA8	0.000999689		PCDH19	0.000539039
KCNG1	0.00105131		TMEM164	0.000579442
PHGDH	0.00105145		H2AFZ	0.000654768
EIF4EBP1	0.00107349		PCGF5	0.000658151
ORAI3	0.00118744		CDK1	0.000694257
MAP3K14	0.00119975		IL4R	0.000816768
IDI1	0.00123121		CDH12	0.000816768
NES	0.00123268		USP54	0.000956697
GIPC3	0.00123461		ACAT1	0.00116397
RPL4	0.00128684		TSN	0.00123268
EEF1G	0.00128684		ATP5I	0.00124568
CAVIN1	0.00128684		COX7C	0.00135216
CDC42EP1	0.00128684		SYNPO2	0.00140219
AC114284.1	0.00129535		HMGB2	0.00144254
P2RY11	0.00129535		ARHGAP11A	0.00150884
NPR1	0.00135158		ASH1L-AS1	0.0016716
PAX1	0.00137771		MICAL2	0.0017416
TMEM121B	0.00141749		PXMP4	0.00175173
CNIH2	0.00147255		NCAM2	0.00185672
RFLNB	0.0016251		SLTM	0.00185672
ALDOC	0.00163294		GATA2-AS1	0.00186339
2003-09-01	0.00164232		PSMA3	0.00192532
PTK7	0.0017081		TAP1	0.00195145
ZBTB47	0.0017416		FMC1	0.00195145
PRDX5	0.0017719		ENY2	0.00195145
RPL3	0.00185045		SNRPEP4	0.00211701
PLTP	0.00195259		DNM1L	0.00217048
FIBCD1	0.00204141		TRAPPC13	0.00223026
UBE2J1	0.0020828		NDUFB3	0.002559
SLC25A37	0.00211701		SCCPDH	0.0025928
NUPR1	0.00217048		TIMM10	0.00267539
RPL7	0.00220179		PIGK	0.0027337
HOMER2	0.00223026		EHMT2	0.00297181
TKT	0.00227653		THUMPD3-AS1	0.00300456
TMEM132D-AS1	0.00229995		PRDX3	0.00300948
SOX4	0.00232356		OGDH	0.00302748
LRRC56	0.00234361		CYP1A2	0.00315974
KRT15	0.00247595		PLGRKT	0.00336253
HIF1A	0.00249112		CHPT1	0.00381524
FAM131A	0.00260628		ID4	0.00381524
ACSF2	0.0027337		TMEM106C	0.00392873
TIMP1	0.00276385		PNKD	0.00397159
ESYT1	0.00279581		CENPW	0.0039785
ZBED3	0.00279581		CAMK2D	0.00399842
CD83	0.00282029		YWHAZ	0.00400238
LINC00094	0.00309222		AC099329.1	0.00402387
CD44	0.00311652		LRRCC1	0.00420442
MAP2K2	0.0031578		THBS1	0.00442349
HMGCS1	0.0032884		ATP2C2	0.00451752
GNAS	0.00344814		KIAA1161	0.00451752
RCN1	0.00357532		ASPH	0.00477225
AC024293.1	0.003646		MED11	0.00547844
DDX39B	0.00402387		ZFP91-CNTF	0.00579286
MFSD13A	0.00431387		TJP2	0.00587239
PCK2	0.00431387		NDUFA1	0.00595199
PABPC1	0.00434123		EPHA3	0.00605384
VGF	0.00440007		U2SURP	0.00605384
ACHE	0.00449135		SMPDL3A	0.00624261
AARS	0.00451306		POLR2G	0.00624261
NCKAP5L	0.00473712		TMEM141	0.00624851
RPL3P2	0.00478371		SEMA3D	0.00643077
RPL11	0.00503004		CYP1A1	0.00649861
RPL13	0.00503004		MRPS33	0.00649861
INHBB	0.0052026		SUCLG2	0.00649861
AC137723.1	0.00521683		NT5DC1	0.00654491
PCOLCE	0.00530983		COX17	0.00698766
GALNT16	0.00535224		AC243587.1	0.00723332
FOXO1	0.00557338		CCNA2	0.00744523
C12orf10	0.00563633		HSPE1	0.00747922
VASH1	0.00575088		ARL1	0.00761405
CARS	0.00591456		DLX3	0.00783808
CD24	0.00605384		KRR1	0.00799717
RPS27	0.00616697		NUSAP1	0.00799717
IRX3	0.00616697		DLST	0.00799717
SESN3	0.00616697		ODAM	0.00808328
PYCR1	0.00625251		ADIRF	0.00808715
PRRT4	0.00640259		NIT2	0.00808715
ALPL	0.0064277		TLE3	0.00831703
PXDC1	0.00649861		BZW2	0.00874534
ASNS	0.00654491		MICALCL	0.00893893
ARHGEF2	0.00654491		AP001528.2	0.00903116
PAQR4	0.006987		FH	0.00903116
DHPS	0.00715394		EGLN3	0.00917058
EIF3H	0.00761405		MDH1	0.00924122
MAP3K21	0.00765154		MAGEA4	0.00943671
PAX9	0.00777226		PCDH20	0.00945631
TNNT1	0.00808328		REXO5	0.00977821
TWF2	0.00811781		KLK1	0.00988057
SLC39A1	0.00863933		SCLT1	0.010319
AC005912.1	0.00893893		UQCR10	0.0111262
STARD10	0.00893893		NEDD8-MDP1	0.0112732
CREB3L2	0.00905422		TIMM8B	0.0117812
COLCA1	0.00945552		TJP1	0.0120374
CCND3	0.00945794		TNFAIP3	0.0123471
MID1IP1	0.00955934		FAXDC2	0.0123471
MARF1	0.00960994		SRSF7	0.0123471
MTHFD2	0.00977821		COX6C	0.0125092
CLIC4	0.0100781		MECOM	0.0125167
LONRF1	0.011263		TBX3	0.0127459
EEF2	0.0113099		EI24	0.0128683
DUSP8	0.0114525		RAB11FIP1	0.0129254
EGR3	0.0116473		HMGB1P5	0.0129275
C17orf107	0.0116693		ELL2	0.0130616
MFGE8	0.0119337		RACGAP1	0.013077
APEX1	0.0123471		FAM96B	0.0138938
PCED1A	0.0123471		G2E3	0.0139249
CDKN2A	0.0123471		SRSF3	0.0144951
FAM46A	0.0123471		PGM2	0.0149014
DLK2	0.0123471		SRSF5	0.0149014
PEBP4	0.0124024		RTKN2	0.0150842
SLC38A3	0.0125167		LIMCH1	0.0150842
GRIK4	0.0126781		NDUFA9	0.0150842
PYGL	0.0127459		MT1E	0.015746
CUEDC1	0.0127617		GUCY1B3	0.016515
HSPA8	0.0128725		NLN	0.0166145
EBF4	0.013077		GHR	0.0170003
RTN3	0.0139249		SCARA5	0.0170199
ZP3	0.0139284		CFL2	0.018291
SBK1	0.014074		NDUFB4	0.018291
MANBA	0.0140919		KDM1B	0.0187134
CAMK2N1	0.0141319		XAGE1B	0.0189143
FANCF	0.0141391		HPGD	0.0194121
TMEM97	0.0141391		PCNA	0.0195782
GABARAP	0.0141391		C9orf152	0.0196515
RPS15	0.0141391		EIF4E	0.02073
ZNF189	0.0141391		AC104662.2	0.0208068
HDAC8	0.0141391		EML1	0.0210012
EDEM2	0.0143507		ZNF678	0.0210916
SOD3	0.0144951		SLC35F1	0.0223375
HNRNPA1	0.014517		PLK1	0.022898
SCARF2	0.014517		RPSAP47	0.0240084
EFNA3	0.0149732		KIF14	0.0240336
ADO	0.0150569		NQO1	0.0240534
XBP1	0.0150842		UQCC2	0.0240534
DDIT3	0.0150842		ANLN	0.0244763
IRF5	0.0150842		MPC1	0.0256022
SPHK1	0.0150867		GATA6-AS1	0.0258717
PPM1E	0.0151143		LIN7B	0.0258717
SLC16A8	0.0151245		SMAD9	0.0262083
BCAM	0.0153129		GOLIM4	0.0263301
NACAP1	0.0153129		PTK2B	0.0266086
SNRPN	0.0154139		AC006504.5	0.0266671
FADS1	0.0154139		LRRC15	0.0268676
VPS37D	0.0155626		SPTB	0.0270028
RPL18A	0.015746		ELMOD1	0.0273269
SDC3	0.0157803		CA13	0.0275387
RACK1	0.0157803		SDC4	0.0284432
SIRPA	0.0157935		SFXN1	0.0287956
PSD	0.0160425		TPM3	0.0287956
PLEKHH1	0.0163952		SOD1	0.0288244
MLXIPL	0.0164522		CIT	0.029483
MEX3A	0.0164938		POLR2C	0.0297053
CNKSR3	0.0164976		AC008014.1	0.0304577
MEIS3	0.0165033		EFCAB2	0.0304577
LINC00638	0.0167144		STK26	0.0311934
ZFYVE19	0.0170003		MYO1C	0.0314543
MARS	0.0170188		PDGFRB	0.0320121
FIBP	0.0170853		SNORA59B	0.0323359
NAB2	0.0170853		TXNDC17	0.0323606
EML3	0.0172466		RDM1	0.0324035
SSBP4	0.0174787		AC020915.1	0.0325326
PSAT1	0.0174787		LYRM2	0.0325552
RPL8	0.0175659		MGAT4C	0.0325947
PROCR	0.0175659		TRIM69	0.0325947
FNDC10	0.0178912		LINC00467	0.0325947
RPL29	0.0181742		CPT2	0.0325947
MCIDAS	0.0181742		PFDN1	0.0325947
NKX2-1	0.0181742		ATP5H	0.0325947
TUBA1A	0.0184928		DEPDC1B	0.0328485
UBAP1	0.0205665		MSL3	0.0331413
ECM1	0.0205665		ADIPOR1	0.0334985
ACSL1	0.0205905		CTNNB1	0.0335091
LRRC10B	0.02073		AL392172.1	0.0336065
GDF11	0.0208395		ZNF738	0.0336905
ATF2	0.0209999		RPA3	0.0336905
VPS37B	0.0210597		RPL17-C18orf32	0.0336905
SESN2	0.0210597		PDHB	0.0336905
LAMP3	0.0210784		COPS7A	0.0337484
C8orf4	0.0212792		TXN	0.0337623
SOCS2	0.0213173		HMMR	0.0339703
TNC	0.0213423		SKIL	0.0362838
RAB39B	0.021541		GFM2	0.0362838
HMGA1	0.0219445		LPL	0.0366515
CHAC1	0.0219445		M6PR	0.0367194
MXRA8	0.022534		MCUB	0.03691
HBE1	0.022534		WDR1	0.03691
FAM210B	0.0226649		MYL12A	0.0369964
RPL28	0.0232199		AP003057.1	0.0376176
FAM184A	0.0235207		DMAC1	0.0376176
SP6	0.0243903		RCAN2	0.0376389
TMED3	0.0244763		ATOH8	0.0377865
RPL23A	0.0244763		SPIN4	0.0388034
RPS11	0.0244763		CLPB	0.0389564
APOD	0.0244763		CBWD3	0.0390591
FAM184B	0.0251825		TOMM6	0.0403605
NRN1	0.0251956		EDN2	0.0407268
RPS4Y1	0.0253209		2001-03-01	0.0407287
RPL7A	0.0253209		GAS2L3	0.0407833
EEF1D	0.0253209		CYCS	0.0407833
ABHD15	0.0253602		MYO18A	0.0411271
SCN4B	0.0254945		ATP5G3	0.041502
SLC35E2B	0.0258166		CEP70	0.041827
PHLPP1	0.0258717		AC239868.3	0.0426278
RIPOR2	0.0258717		EBAG9	0.042773
SLC1A5	0.0261804		GABRB3	0.0431885
MAP1LC3A	0.0262083		ZWILCH	0.0431885
NEFL	0.0262083		GBA	0.0431885
C1QL1	0.0262083		RRM2	0.0431885
SLC9A3	0.0263301		PCTP	0.0432654
TRIB3	0.0264507		GPX1	0.043787
RPL18	0.0265044		PDXDC2P	0.0455706
ADRA2C	0.0266086		SNAPC5	0.0457317
RASGRF1	0.026651		FABP5P7	0.0458254
C2orf72	0.0268944		BOLA3	0.0462627
MYT1	0.0274303		NUF2	0.0474907
JUND	0.0276015		MARVELD2	0.0476224
MAMLD1	0.0278412		FZD4	0.0478613
PDCD7	0.0280724		ABCA3	0.0487553
ATP11A	0.0287299		MT1F	0.0491183
RNASET2	0.0288413		TSPAN15	0.0492261
RPS19	0.0288413		RBX1	0.0492745
PRKAB1	0.029483
EIF3FP3	0.0297053
FAM213A	0.0300944
NUDT4	0.0303419
HGNC:18790	0.0304577
SEMA4G	0.0304577
DHCR7	0.0311571
RPL10	0.0311934
FOXD1	0.0311934
DNAJB5	0.0314543
RELN	0.0314543
AGR2	0.0318268
SCARB1	0.0323359
MCRIP1	0.032416
RNF130	0.0325326
RASGRP2	0.0325567
YIPF3	0.0325947
LZTS3	0.0325947
BBC3	0.0325947
AC099336.2	0.0325947
ARHGEF3	0.0325947
AC034236.1	0.0325947
ANKRD23	0.0327236
HBQ1	0.0327236
SGCE	0.0328138
TNFRSF18	0.0328138
IFT74	0.0328485
HOXB13	0.0331735
TUBB8P12	0.033624
MXRA7	0.0336905
KLHL21	0.0337484
PCDHB10	0.03388
RSPO4	0.0339703
FAM171A1	0.0339703
EFNB3	0.0343152
STX5	0.0346136
PITPNC1	0.035187
GRIP1	0.0356904
AC023301.1	0.0360313
C1orf122	0.0360838
CRABP2	0.0362636
NETO1	0.0362838
FOXD2-AS1	0.0362838
APBB1	0.0366515
RHOQ	0.0366555
RAB24	0.03691
GPR176	0.03691
SPDEF	0.0370836
ST6GALNAC4	0.0374831
MOGS	0.0376561
MAP6	0.0378722
TES	0.0382569
DUSP14	0.0382569
GLIPR2	0.0382776
GADD45G	0.0389564
EPHA8	0.03927
PODXL2	0.0395338
ZFYVE9	0.0398499
WIF1	0.0401736
RIMBP3	0.0401736
AMZ1	0.0407268
EIF2AK3	0.0407287
PEX6	0.0407287
MIF4GD	0.0407287
FLJ36000	0.0407287
KLF9	0.0407833
CCDC85A	0.0407833
SMIM10L1	0.041502
RPL31	0.041827
NOP53	0.041827
RPL37	0.041827
PLCXD2	0.041827
RPS2	0.041955
EMILIN3	0.0424078
RPL9P9	0.042444
TMEM132A	0.0426278
AC104563.1	0.0426278
AC027031.2	0.0426278
LHX6	0.0426278
ZNF776	0.0427036
MBD5	0.0427036
PALM	0.042871
EGFL7	0.0430177
BX679664.3	0.0431496
FKBP5	0.043184
PLA2G4A	0.0432654
NFKB2	0.0440308
KAZN	0.0440569
SYT17	0.0440838
NID1	0.0448551
ZCCHC7	0.0455374
ZC4H2	0.0455374
PTGS2	0.0455374
SCNN1D	0.0457317
RPL13A	0.0457456
HDDC3	0.0459701
IRX5	0.0463898
ZNF444	0.0466563
GARS	0.0467026
TMEM216	0.0467026
FRMD8	0.0467026
BRPF3	0.0473658
WNT3A	0.0474907
RPS23P8	0.0477679
AACS	0.0477679
RPL23AP42	0.0477679
ZNF616	0.0479571
EIF3F	0.0482034
MAFA	0.0486424
KIAA1549L	0.0487153
LIPH	0.0487556
CLCF1	0.0488531
SLC17A7	0.0492261
PC	0.0492745
AL021707.2	0.0497635
EPOP	0.0499336
